# Supplementary material for: Prognostic relevance of treatment deviations in children with relapsed acute lymphoblastic leukemia who were treated in the ALL-REZ BFM 2002 study
Source: PubMed Central journal article supplement (PMC11794146; doi:10.1038/s41375-024-02474-6), 2024-12-11
Supplement: 41375_2024_2474_MOESM1_ESM.pdf [file 41375_2024_2474_MOESM1_ESM.pdf]

## Supplementary Information

### **Prognostic relevance of treatment deviations in children with relapsed acute lymphoblastic leukemia who were treated in the ALL-REZ BFM 2002 study**

**Authors:** Eleni A. Argyriadi<sup>1✉</sup>, Ingo G. Steffen<sup>1</sup>, Christiane Chen-Santel<sup>2</sup>, Andrej Lissat<sup>1</sup>, Andishe Attarbaschi<sup>3</sup>, Jean-Pierre Bourquin<sup>4</sup>, Guenter Henze<sup>1</sup>, Arend von Stackelberg<sup>1</sup>

<sup>1</sup>Department of Pediatric Oncology Hematology, Charité- Universitätsmedizin Berlin, Berlin, Germany. <sup>2</sup> Universitätsklinikum Leipzig, Klinik und Poliklinik für Kinder- und Jugendmedizin, Abteilung für Pädiatrische Onkologie, Hämatologie und Hämostaseologie, Leipzig, Germany. <sup>3</sup>Department of Pediatric Hematology and Oncology, St. Anna Children's Hospital, Medical University of Vienna, Vienna, Austria. <sup>4</sup>Department of Pediatric Oncology, University Children's Hospital, Zurich, Switzerland.

✉email: eleni.argyriadi@charite.de. Competing interests: EA, IS, GH, CC-S, AL, AA, JPB have no conflict of interest to declare. AvS declares consulting role and honoraria from Amgen, Novartis, Jazz, Miltenyi

This file contains information on the treatment protocol design and the enrollment of patients in the current study. Comparisons of the different categories of deviations are presented. Five-year OS and DFS of patients with versus without protocol deviations (in terms of cause, type and occurrence time of the deviation) are displayed along with 95% confidence intervals.

## **Supplementary Methods**

Supplementary Definition: Protocol ALL-REZ BFM 2002 conform adjustments. 3

## **Supplementary Tables**

Supplementary Table 1: Strategy groups S1 to S4 of patients in ALL-REZ BFM 2002 trial. 3

Supplementary Table 2: Classification and description of deviations of ALL-REZ BFM 2002 trial: Number of deviations by type and reason. 3

Supplementary Table 3: Influence of deviations before response evaluation on the remission rates in patients of ALL-REZ BFM 2002 trial. 4

Supplementary Table 4: Different ways of change of the radiation plan of the protocol ALL REZ BFM 2002. 4

Supplementary Table 5: Preterm termination of the intensive chemotherapy. 5

## **Supplementary Figures**

Supplementary Figure 1: Treatment design of trial ALL-REZ BFM 2002. 6

Supplementary Figure 2: Flow diagram of enrolment and analysis for study patients. 6

Supplementary Figure 3: Mantel Byar analyses; Simon Makuch plots of Disease-free survival (A) and Overall Survival (B) of patients in the trial ALL-REZ BFM 2002 in relation to the cause of deviation. 7

Supplementary Figure 4: Mantel Byar analyses; Simon Makuch plots of Disease-free survival and Overall Survival of patients with versus without protocol deviations in relation to the phase of the ALL-REZ BFM 2002 protocol. 8

Supplementary Figure 5: Mantel Byar analyses; Simon Makuch plots of Disease-free survival (A) and Overall Survival (B) of patients in the trial ALL-REZ BFM 2002 in relation to the type of deviation. 9

**Supplementary Definition: Protocol ALL-REZ BFM 2002 conform adjustments**

**7.7 Reduction of the treatment intensity based on toxicity (page 61)**

Modified WHO criteria for the classification of specific side effects are used to assess toxicity (table 13, p.62).

If the solid line demarcating the zone of dangerous toxicity is crossed during the preceding block or if the dashed line that demarcates the zone of alarming toxicity is crossed immediately prior to starting a new treatment element the following recommendations apply.

- in a subsequent **Block R1** cytarabine is reduced to 60% of the target dose and 6-mercaptopurine is administered at the original dose but only on day 1 to 3.
- in a subsequent **Block R2** ifosfamide and thioguanine are administered at the original dose but only on days 1 to 3.

The suggested approach attempts to accommodate the wide range of individual treatment toxicity. It is probable that not every situation that occurs in individual patients can be recorded and assessed in a standardized fashion. (1)

**Supplementary Table 1: Strategy groups S1 to S4 of patients in ALL-REZ BFM 2002 trial**

| Immunophenotype | pB-ALL      |             |             | T-ALL       |             |             |
|-----------------|-------------|-------------|-------------|-------------|-------------|-------------|
|                 | Isolated EM | Combined BM | Isolated BM | Isolated EM | Combined BM | Isolated BM |
| Very early      | S2          | S4          | S4          | S2          | S4          | S4          |
| Early           | S2          | S2          | S3          | S2          | S4          | S4          |
| Late            | S1          | S2          | S2          | S1          | S4          | S4          |

**Supplementary Table 2: Classification and description of deviations of ALL-REZ BFM 2002 trial: Number of deviations by type and reason**

| Reason vs. Type of deviation                      | Total (%) | Impaired Response | Toxicity | Other Reasons (parents,logistics,not found) |
|---------------------------------------------------|-----------|-------------------|----------|---------------------------------------------|
| Modification of the Order of the Blocks           | 35 (37)   | 7 (19)            | 20 (63)  | 8 (32)                                      |
| Preterm termination of the intensive chemotherapy | 10 (11)   | 0 (0)             | 9 (28)   | 1 (4)                                       |
| Prephase modification                             | 7 (7)     | 1 (3)             | 1 (3)    | 5 (20)                                      |
| Intervention due to positive MRD                  | 29 (31)   | 29 (78)           | 0 (0)    | 0 (0)                                       |
| Change of radiation                               | 13 (14)   | 0 (0)             | 2 (6)    | 11 (44)                                     |
| All patients                                      | 94 (100)  | 37 (100)          | 32 (100) | 25 (100)                                    |

**Supplementary Table 3: Influence of deviations before response evaluation on the remission rates in patients of ALL-REZ BFM 2002 trial**

|                                              | Total (%) | Remission Number(%) | NR/ID Number(%) | Univariate OR    | P-Value | Multivariate OR   | P-Value |
|----------------------------------------------|-----------|---------------------|-----------------|------------------|---------|-------------------|---------|
| <b>Randomization</b>                         |           |                     |                 |                  | 0.16    |                   | 0.42    |
| No                                           | 250       | 214(86)             | 36(14)          |                  |         |                   |         |
| Yes                                          | 437       | 389(89)             | 48(11)          | 1.39             |         | 1.24              |         |
| <b>Relapse time point</b>                    |           |                     |                 |                  | <0.001  |                   | <0.001  |
| Late                                         | 339       | 324(96)             | 15(4)           |                  |         |                   |         |
| Early                                        | 199       | 175(88)             | 24(12)          | 0.33             |         | 0.24              |         |
| Very early                                   | 149       | 104(70)             | 45(30)          | 0.1              |         | 0.11              |         |
| <b>Immunophenotype</b>                       |           |                     |                 |                  | 0.008   |                   | 0.07    |
| T cell                                       | 83        | 62(75)              | 21(25)          |                  |         |                   |         |
| Non-T cell                                   | 531       | 477(90)             | 54(10)          | 3.04             |         | 2.33              |         |
| No data                                      | 73        | 64(88)              | 9(12)           | 2.4              |         | 2.01              |         |
| <b>Site of relapse</b>                       |           |                     |                 |                  | 0.002   |                   | <0.001  |
| Isolated BM                                  | 426       | 362(85)             | 64(15)          |                  |         |                   |         |
| Combined BM                                  | 127       | 113(89)             | 14(11)          | 1.4              |         | 1.5               |         |
| Isolated EM                                  | 134       | 128(95)             | 6(5)            | 3.71             |         | 6.88              |         |
| <b>Deviation before response evaluation*</b> |           |                     |                 |                  | 0.39    |                   | 0.52    |
| No                                           | 657       | 579(88)             | 78(12)          |                  |         |                   |         |
| Yes                                          | 30        | 24(80)              | 6(20)           | 0.64 (0.26-1.96) |         | 1.47 (0.52- 4.94) |         |

NR=non response, ID=induction death, OR=odds ratio, \*response evaluation= remission or non response or induction death, EM=extramedullary

**Supplementary Table 4: Different ways of change of the radiation plan of the protocol ALL REZ BFM 2002**

| Change of the radiation plan | No CNS radiation | Other local radiation not received | Radiation beyond the protocol | Other | Total |
|------------------------------|------------------|------------------------------------|-------------------------------|-------|-------|
| Number of patients           | 8                | 1                                  | 4                             | 1     | 14    |

**Supplementary Table 5: Preterm termination of the intensive chemotherapy**

| Protocol phase                                                       | Reason of termination                                                                                                                                                                                                                                                                                                                                             | Instead of intensive chemotherapy                                     |
|----------------------------------------------------------------------|-------------------------------------------------------------------------------------------------------------------------------------------------------------------------------------------------------------------------------------------------------------------------------------------------------------------------------------------------------------------|-----------------------------------------------------------------------|
| Preterm termination of the intensive chemotherapy after 1st Block    | Discontinuation of therapy due to massive toxicity = severe mucositis with corresponding pain symptoms, pancreatitis, hepatitis, sepsis, thrombocytopenia, anemia                                                                                                                                                                                                 | Maintenance therapy with 6 mercaptopurine (MP) and methotrexate (MTX) |
| Preterm termination of the chemotherapy after 2nd Block              | Septical shock with respiratory and cardiovascular arrest and cardiopulmonary resuscitation, encephalopathy due to hypoxia during resuscitation, with existing neurological symptoms, patient intubation and infection dose reduction of Prot II IDA Prots but not well tolerated, therefore termination of intensive chemo and beginning of maintenance therapy. | Maintenance therapy with 6MP and MTX                                  |
| Preterm termination of the intensive chemotherapy after 3rd Block    | Tuberkulosis                                                                                                                                                                                                                                                                                                                                                      | Anti TB treatment and maintenance therapy                             |
| Preterm termination of the intensive chemotherapy after 4th Block    | Because of SAE : sepsis with gangrene of the ascending colon, emergency helikolectomy, ventilation in the intensive care unit                                                                                                                                                                                                                                     | Maintenance therapy and HSCT with non-myeloablative conditioning      |
| Preterm termination of the intensive chemotherapy after 5th Block    | Because of SAE (colitis and bilateral preural effusions) termination of the protocol therapy                                                                                                                                                                                                                                                                      | HSCT                                                                  |
| Preterm termination of the intensive chemotherapy after 5th Block    | Severe encephalopathy after a prolonged seizure with tetraspasticity and reduced vigilance. Due to the unclear neurological situation, the last two chemotherapies of the protocol were not administered and instead, the maintenance therapy was preferred and well tolerated for 2 years                                                                        | Maintenance therapy with 6MP and MTX                                  |
| Preterm termination of the intensive chemotherapy after 6th Block    | SAE: sepsis after F1, fever in neutropenia after F2, pneumonia after R1, brain damage as a result of hypoxia during cardiopulmonary reanimation with cardiopulmonary decompensation during anesthetic initiation.                                                                                                                                                 | Maintenance therapy with 6MP and MTX                                  |
| Preterm termination of the chemotherapy after 8th Block              | Termination due to high therapy toxicity: neurological problems, seizures, double vision, consciousness, leukoencephalopathy, catheter sepsis, abscess in the area of the right thigh                                                                                                                                                                             | No info                                                               |
| Preterm termination of the intensive chemotherapy during PROT II IDA | Intensive care unit because of respiratory insufficiency and sepsis.                                                                                                                                                                                                                                                                                              | LFU/ Parents decided to return to Moscow                              |
| Preterm termination of the intensive chemotherapy after Prot. II IDA | Down Syndrom                                                                                                                                                                                                                                                                                                                                                      | No info                                                               |

**Supplementary Figure 1**

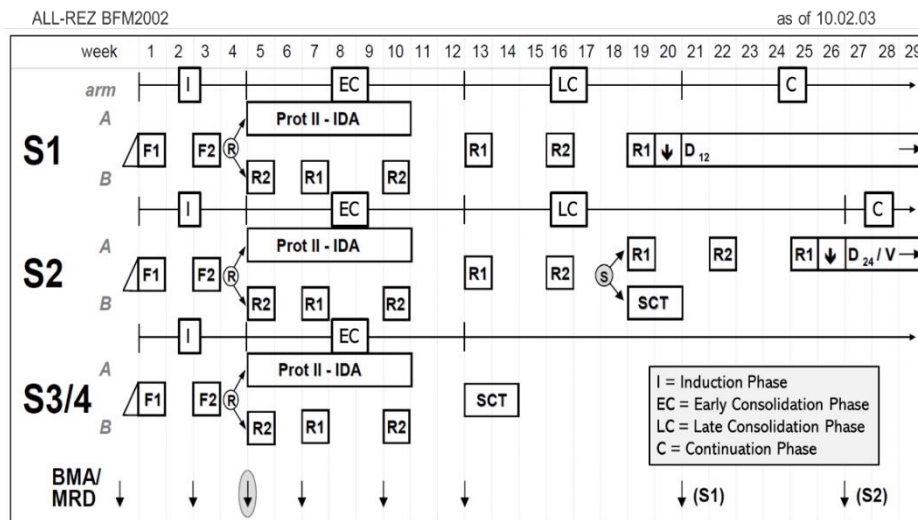

**Supplementary Figure 1:** Treatment design of trial ALL-REZ BFM 2002. D<sub>12</sub>/D<sub>24</sub>, 12/24 Months maintenance; (R), Randomization; (S), Stratification V, VP16 reinduction pulse; ↓, Local radiation therapy; (BMP), BMP-Timepoint for postremission stratification in S2; SCT, Stem cell transplantation; BMP, Bone marrow puncture; MRD, minimal residual disease; Chemotherapy courses: F1, F2, R2, R1, Protocol II-IDA.

**Supplementary Figure 2**

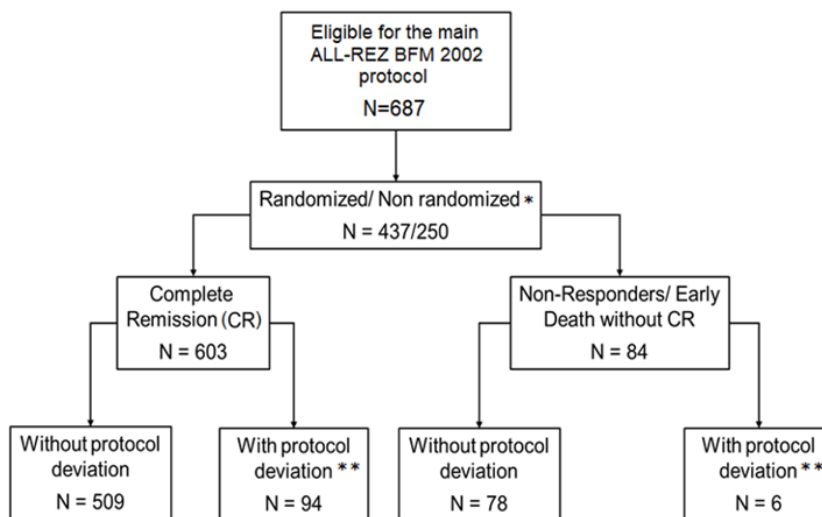

**Supplementary Figure 2:** Flow diagram of enrolment and analysis for study patients (up to 18 years with first relapse of ALL). CR; complete remission. \*Not randomized for the study question R-courses versus protocol II-IDA. \*\*The total number of patients with protocol deviation was 100 (1)

**Supplementary Figure 3**

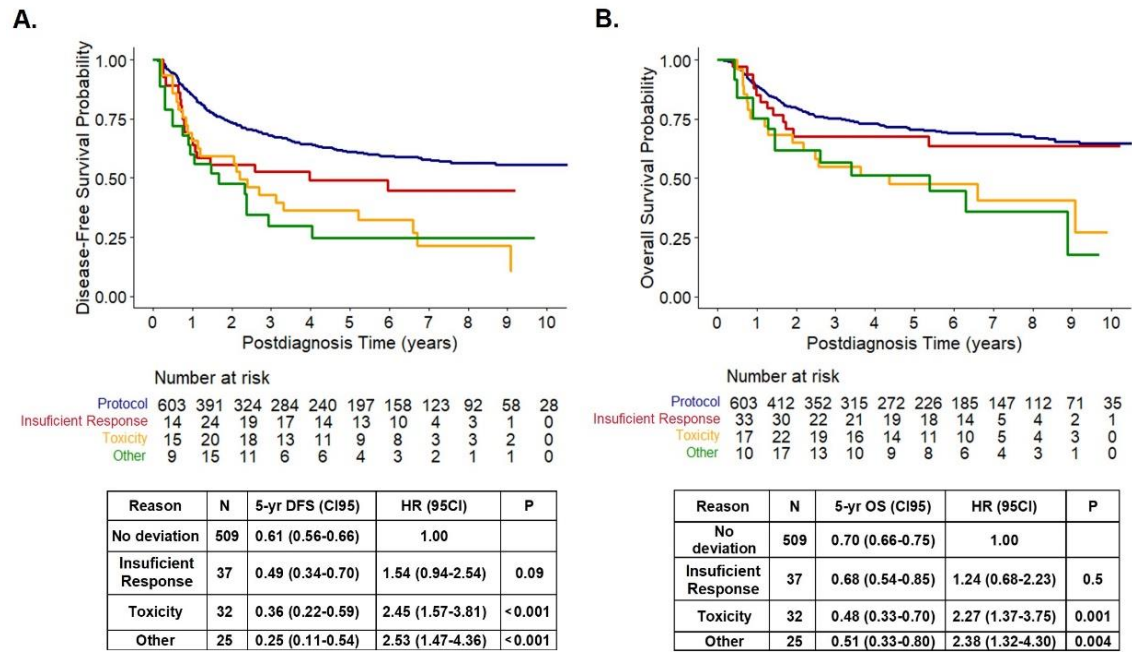

**Supplementary Figure 3:** Mantel Byar analyses; Simon Makuch plots of Disease-free survival (A) and Overall Survival (B) of patients in the trial ALL-REZ BFM 2002 in relation to the cause of deviation; no deviation, insufficient response, toxicity and other reasons. pDFS, probability of disease-free survival; pOS, probability of overall survival; 95CI, 95% Confidence Interval; HR, hazard ratio

Supplementary Figure 4

**A. Deviation during Induction**

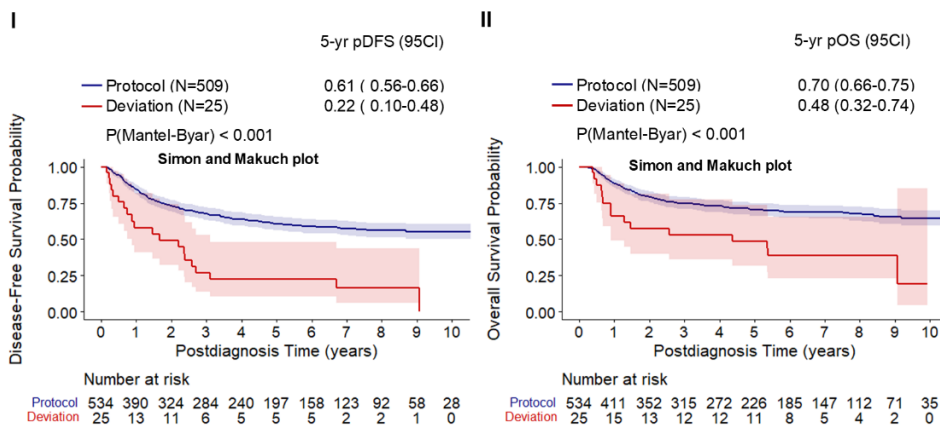

**B. Deviation during Consolidation**

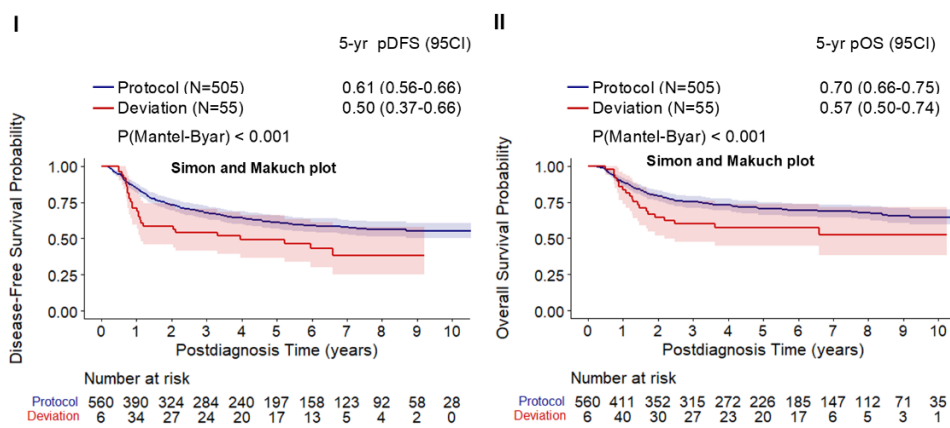

**C. Deviation during Continuation**

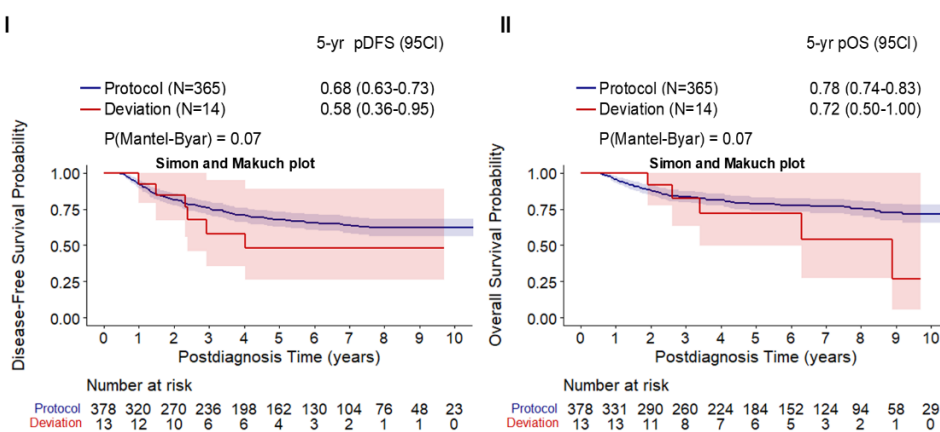

**Supplementary Figure 4:** Mantel Byar analyses; Simon Makuch plots of Disease-free survival and Overall Survival of patients with versus without protocol deviations in relation to the phase of the ALL-REZ BFM 2002 protocol; (A) Induction; (B) Consolidation; (C) Continuation. pDFS, probability of disease-free survival; pOS, probability of overall survival; 95CI, 95% Confidence Interval



Supplementary Figure 5

A.

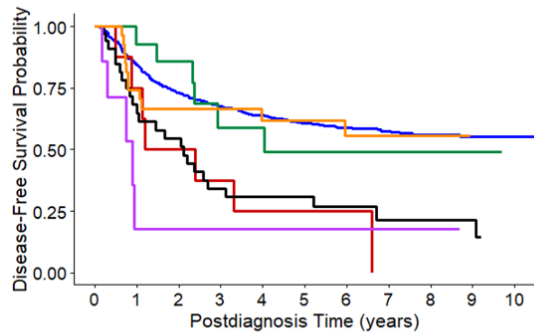

|                                  | 0   | 1   | 2   | 3   | 4   | 5   | 6   | 7   | 8  | 9  | 10 |
|----------------------------------|-----|-----|-----|-----|-----|-----|-----|-----|----|----|----|
| Number at risk                   | 603 | 391 | 324 | 284 | 240 | 197 | 158 | 123 | 92 | 58 | 28 |
| Protocol                         | 603 | 391 | 324 | 284 | 240 | 197 | 158 | 123 | 92 | 58 | 28 |
| Termination                      | 4   | 6   | 4   | 3   | 2   | 1   | 1   | 0   | 0  | 0  | 0  |
| Order Modification               | 20  | 20  | 16  | 10  | 9   | 8   | 7   | 3   | 3  | 3  | 0  |
| Prephase Modification            | 7   | 1   | 1   | 1   | 1   | 1   | 1   | 1   | 1  | 0  | 0  |
| Radiation                        | 13  | 12  | 10  | 6   | 6   | 4   | 3   | 2   | 1  | 1  | 0  |
| Intervention due to positive MRD | 27  | 20  | 17  | 16  | 13  | 12  | 9   | 3   | 2  | 0  | 0  |

| Type                             | N   | 5-yr DFS (CI95)  | HR (95CI)        | P      |
|----------------------------------|-----|------------------|------------------|--------|
| Protocol                         | 509 | 0.61 (0.56-0.66) | 1.00             |        |
| Termination                      | 10  | 0.24 (0.07-0.82) | 3.30 (1.54-7.02) | 0.002  |
| Order Modification               | 35  | 0.29 (0.17-0.51) | 2.73 (1.78-4.18) | <0.001 |
| Prephase Modification            | 7   | 0.18 (0.03-1.00) | 4.3 (1.76-10.5)  | 0.001  |
| Radiation                        | 13  | 0.48 (0.26-0.89) | 1.45 (0.64-3.29) | 0.4    |
| Intervention due to positive MRD | 29  | 0.62 (0.46-0.84) | 1.17 (0.64-2.15) | 0.6    |

B.

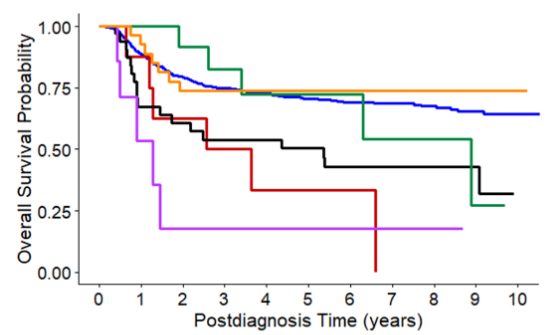

|                                  | 0   | 1   | 2   | 3   | 4   | 5   | 6   | 7   | 8   | 9  | 10 |
|----------------------------------|-----|-----|-----|-----|-----|-----|-----|-----|-----|----|----|
| Number at risk                   | 603 | 412 | 352 | 315 | 272 | 226 | 185 | 147 | 112 | 71 | 35 |
| Protocol                         | 603 | 412 | 352 | 315 | 272 | 226 | 185 | 147 | 112 | 71 | 35 |
| Termination                      | 4   | 7   | 5   | 4   | 2   | 1   | 1   | 0   | 0   | 0  | 0  |
| Order Modification               | 20  | 20  | 18  | 16  | 16  | 14  | 11  | 6   | 5   | 4  | 0  |
| Prephase Modification            | 7   | 3   | 1   | 1   | 1   | 1   | 1   | 1   | 1   | 0  | 0  |
| Radiation                        | 13  | 13  | 11  | 8   | 7   | 6   | 5   | 3   | 2   | 1  | 0  |
| Intervention due to positive MRD | 27  | 26  | 19  | 18  | 16  | 15  | 12  | 4   | 3   | 1  | 1  |

| Type                             | N   | 5-yr OS (CI95)   | HR (95CI)         | P      |
|----------------------------------|-----|------------------|-------------------|--------|
| Protocol                         | 509 | 0.70 (0.66-0.75) | 1.00              |        |
| Termination                      | 10  | 0.33 (0.11-0.95) | 3.20 (1.41-7.24)  | 0.005  |
| Order Modification               | 35  | 0.50 (0.35-0.72) | 2.31 (1.42-3.77)  | <0.001 |
| Prephase Modification            | 7   | 0.18 (0.03-1.00) | 5.12 (2.09-12.54) | <0.001 |
| Radiation                        | 13  | 0.72 (0.50-1.00) | 1.40 (0.57-3.42)  | 0.5    |
| Intervention due to positive MRD | 29  | 0.74 (0.59-0.92) | 0.87 (0.41-1.86)  | 0.7    |

**Supplementary Figure 5:** Mantel Byar analyses; Simon Makuch plots of Disease-free survival (A) and Overall Survival (B) of patients in the trial ALL-REZ BFM 2002 in relation to the type of deviation; no deviation, preterm termination of the intensive chemotherapy, modification of the order of treatment courses, change of the cytoreductive prephase, modification of radiation plan, intensification due to MRD. pDFS, probability of disease-free survival; pOS, probability of overall survival; 95CI, 95% Confidence Interval; HR, hazard ratio

**Reference:**

1. Henze G, Charite University Berlin, Germany. ALL-REZ BFM 2002: Multi-Center Study for Children With Relapsed Acute Lymphoblastic Leukemia: ClinicalTrials.gov. Bethesda (MD): National Library of Medicine (US). 2000- [cited 2009 Jul 18]. NLM identifier: NCT00114348; 2005 [Available from: <http://clinicaltrials.gov/ct2/show/NCT00114348>]
